# Supplementary material
Source: PubMed Central journal article supplement (PMC2726377)
Supplement: 0906598106_0906598106SI.pdf [file 0906598106_0906598106SI.pdf]

# Supporting Information

Staneloni et al. 10.1073/pnas.0906598106

## SI Text

**Transgenic Lines Carrying the –152 to +67 Fragment of the *Lhcb1\*2* Promoter.** The –152 to +67 fragment, and the 4-bp substitution to CCC in the context of this fragment of *Lhcb1\*2* were obtained by PCR with specific primers bearing a *Hind*III tail at its 5' end using a pUC19-derived plasmid bearing the –152 (*Hind*III) to +67 (*Bam*HI) fragment of the *Lhcb1\*2* promoter as template. The amplified fragments were cut with *Hind*III and *Bam*HI and subcloned in the pBI101.2 vector, containing the *gusA* reporter gene (1), and sequenced. The fragments were introduced into *A. thaliana* accession Columbia by way of *Agrobacterium tumefaciens*, using the floral dip method (2). Lines homozygous for the *Lhcb1\*2* promoter fusion to *gusA* were selected by kanamycin resistance. The nature and integrity of the transgene were verified by PCR. The activity of the promoter was normalized to the values observed in seedlings treated with hourly R pulses because this was unaffected by the substitutions [average GUS activity, (nmol 4-MU mg<sup>-1</sup> min<sup>-1</sup>) under R: control = 0.97 ± 0.07; –145 = 0.95 ± 0.04; –143 = 0.95 ± 0.03; –139 = 0.82 ± 0.07; –135 = 0.98 ± 0.04; –131 = 0.97 ± 0.12; –127: 1.01 ± 0.09; –123: 0.89 ± 0.13].

**Transgenic Lines Carrying the –453 to +67 Fragments of the *Lhcb1\*2* Promoter.** The 6-bp substitution in the context of the –453 to +67 fragment of *Lhcb1\*2* were obtained as described for the –152 to +67 fragment. The following substitutions (italics) were introduced into the WT promoter sequence (TCTTGAAAATTGATGGATTACAA): –143 TCTTTCTAGATTGATGGATTACAA; –139 TCTTGGAAGGTACCTGGATTACAA; –135: TCTTGAAAATTGGTACCTTACAA; –129: TCTTGAAAATTGATGGAGGTACC. For each line, activity was normalized to the values under R pulses, which were unaffected by the substitutions [average GUS activity, (nmol 4-MU mg<sup>-1</sup> min<sup>-1</sup>) under R: –453: 1.7 ± 0.2; –143: 1.0 ± 0.2; –139 = 1.3 ± 0.2; –135: 1.3 ± 0.3; –129: 1.4 ± 0.2]. For some experiments the –135 transgene was introduced into the *blh1* mutant background and into the WT seedlings obtained from the population segregating the Salk-089095 T-DNA insert (see below). For each line, activity was normalized to the values under R pulses, which were unaffected by the substitutions or *blh1* mutation [average GUS activity, (nmol 4-MU mg<sup>-1</sup> min<sup>-1</sup>) under R: –453 *BLH1* = 3.2 ± 0.2; –453 *blh1* = 3.3 ± 0.1; –135 *BLH1* = 3.2 ± 0.2; –135 *blh1* = 3.2 ± 0.1].

## Experiments to Measure GUS Activity Driven by the *Lhcb1\*2* Promoter.

One hundred seeds were sown on 3 mL 0.8% agar in clear plastic boxes (40 mm × 33 mm × 15 mm height). The boxes were incubated 5 days at 4 °C, transferred to 22 °C, and exposed to 4 h R (to induce germination) followed by darkness. Two-day-old seedlings were exposed to 3-min hourly pulses of FR (60 μmol m<sup>-2</sup> s<sup>-1</sup>), 3-min hourly pulses of R (20 μmol m<sup>-2</sup> s<sup>-1</sup>) or continuous FR for 24 h or remained in darkness as controls. The seedlings were harvested under dim green light and used for measurements of GUS activity using 4-methylumbelliferyl-b-D-glucuronide (Sigma) as substrate (1). The standard curves were prepared with 4-methylumbelliferone (Sigma).

**Electrophoretic Mobility Shift Assays.** EMSA reactions contained nuclear extract buffer (3), supplemented with 100 ng poly(dIdC)poly-(dIdC) and 0.1 ng of <sup>32</sup>P end-labeled probe (10<sup>8</sup> cpm/μg). The binding reaction (final volume 10 μL) was incubated at room temperature, loaded onto a 5% polyacrylamide gel (30:0.8) and

run at 10 V/cm with 0.5× TBE buffer. The gel was dried on DE81 Whatman paper and autoradiographed. The coding region of *BLH1* (1.5 kb) was cloned from pACT-BLH1 as *Xho*I fragment into pGEX-4T-1 plasmid (Amersham Biosciences). To extract recombinant protein, 5 mL overnight cultures of BL21(DE3, pLys; Novagen) carrying plasmids pGEX-BLH1 were used to inoculate 500 mL LB medium containing 200 μg/mL ampicillin and 50 μg/mL chloroamphenicol and grown at 37 °C to an optical density at 600 nm of 0.5. Next, protein synthesis was induced by the addition of solid IPTG to final concentration of 1 mM and cultures were grown for 4 h at 29 °C. The harvested cells were suspended in 20 mL PBS and frozen in liquid nitrogen. After thawing on ice, the bacteria were lysed by sonication (8 × 10 s burst; 5-s pause between bursts), centrifuged (at 18,000 rpm for 30 min at 4 °C), and the supernatant was filtered through a 0.45-μm membrane. Protein purification was performed using PolyPrep Chromatography columns (731–1550; Bio-Rad Laboratories) containing 0.5 mL settled Glutathion-Sepharose 4B beads (Amersham Biosciences). Columns were first washed 2 times with 10 mL PBS before bacterial extract was passed through. After binding, columns were washing with 10 mL PBS and bounded proteins were eluted in 2.5 mL (10 × 0.25 mL) glutathion elution buffer (100 mM glutathione, 500 mM Tris-HCl, pH 8.0). Eluted protein was concentrated using Microcone Centrifugal Filter devices (Millipore) according to manufacturer's protocol, and the protein content was determined by the method of Bradford.

The probes used in EMSA experiments were:

HIRa 5'-GGCCGCTGATGGATTACAAAGTGCCATGTAGATCTT,

HIRa m 5'-GGCCGCTGACCCCTTACAAAGTGCCATGTAGATCTT,

HIRb 5'-GGCCGCGAAAATTGATGGATTACAAAGTAGATCTT, and

HIRb m 5'-GGCCGCGAAAATTGACCCCTTACAAAGTAGATCTT.

**Yeast Transformation and Library Description.** The *Arabidopsis* cDNA expression library was obtained from ABRC [accession CD4–22; (4)] and is derived from mRNA isolated from the 3 days-old etiolated seedlings, which after conversion into cDNA is cloned into λACT. The auxotrophic marker on the pACT vector is *LEU2* and cDNAs are cloned as translational fusions with the transcription activation domain of Gal4p. The screening of the library was carried out on histidine-lacking medium with 2 mM 3-AT, a competitive inhibitor of His3p. Putative positive yeast colonies were isolated and restreaked in the presence of different concentrations of 3-AT. Finally, pACT plasmids were isolated from yeast by using the Y-DER Yeast DNA Extraction Reagent kit (Pierce), and the cDNA region was sequenced using primer pACT-Fw 5'-CCCACCAAACCCAAAAAAG-3'.

**Genotyping of *blh1* Mutants.** Seedlings homozygous for the *blh1-1* or *BLH1* alleles were screened in the segregating population by using the LBb1 primer (ABRC) and 5'-TTTCCAGCCGCTTAAG-CATACA-3' or the latter primer and 5'-AGCCCAATGGCGGACACTAAT-3', respectively. The Ds insertion in the *blh1-4* allele was amplified with primers Ds5–1 5'-GAAACGGTTCGG-GAAACTAGCTCTA-3' and 5'-GTGTTGTTGATGATGTT-GCTGTT-3', and the WT allele was amplified with the latter and 5'-TATCAATCCAGGTTCTTCATCTTTT-3'. The *blh1-5* or *BLH1* alleles were screened in the segregating population by using

the Spm32 (JIC SM) 5'-TACGAATAAGAGCGTCCATTTTA-GAGTGA-3' and 5'-TACTAAGTTTTGCTTTCTTCATCTG-TATTT or the latter primer and 5'-CAACTACTAATTATA-CATAGATGGCTGCTT-3', respectively.

**Experiments to Measure Hypocotyl Growth Inhibition, Cotyledon Unfolding, Anthocyanin Levels, and Cotyledon Angle.** Fifteen (hypocotyl growth, cotyledon angle, and hypocotyl orientation) or 50 (anthocyanin) seeds were sown on 3 mL 0.8% agar in clear plastic boxes (40 × 33 × 15 mm height). In hypocotyl-angle experiments (randomization of growth orientation) all of the seeds were sown on the same line, approximately 10 mm above the 40 mm side of the box. The boxes were incubated 5 days at 4 °C, transferred to 22 °C and exposed to 4 h R (to induce germination) followed by darkness. One-day-old seedlings were transferred to the different light or dark conditions for 3 days before measurements. The seedlings were exposed to 3-min hourly pulses of FR (60 μmol m<sup>-2</sup> s<sup>-1</sup>), 3-min hourly pulses of R (20 μmol m<sup>-2</sup> s<sup>-1</sup>), or continuous FR of the fluence rate indicated in the figure legends. Hypocotyl length was measured to the nearest 0.5 mm with a ruler. Only the 10 longest hypocotyls of each box were averaged and used as a replicate for statistics, to avoid seedlings with defects. Inhibition of hypocotyl growth relative to dark controls was calculated as (length in darkness - length under a given condition)/length in darkness. Cotyledon angle was measured with a protractor. For hypocotyl angle experiments, the position of the boxes containing 1-day-old seedlings was shifted to place the agar plane normal to the horizontal plane. Then the boxes were transferred to the different light or dark conditions for 3 days. The angle of the hypocotyl with respect to the vertical position was measured by placing the box on a protractor. For the measurement of anthocyanin levels, the seedlings were harvested for extraction with 1 mL 1% (wt/vol) HCl methanol. Absorbance at 530 nm was measured and corrected for chlorophyll absorption by subtracting 0.25 absorbance at 657 nm.

**Analysis of Gene Expression by Quantitative PCR.** Total RNA was extracted using RNeasy Plant Mini Kit columns (Qiagen). One microgram RNA was reverse-transcribed into cDNA by using the SuperScript III Reverse Transcriptase (Invitrogen). The cDNA was purified by alkaline degradation (NaOH, 65 °C for 30 min) and precipitated with ethanol. The OliGreen ssDNA Reagent (Molecular Probes) was used to quantify the single-stranded cDNA. Primers, SYBR Green, ROX, and cDNA were mixed with the TaqDNA Polymerase Recombinant (Invitrogen), and the reaction was carried out in a Stratagene Mx 3005 System. The cycling conditions were: 95 °C for 10 min, followed by 40 cycles of 95 °C for 30 s, 57 °C for 1 min, and 72 °C for 1 min. Raw data were analyzed with Stratagene Mx 3005 software to extract Ct values. Relative expression of each gene was calculated according to the 2<sup>-ΔΔCt</sup> method (5), setting the average value of

the control in darkness as 1. The *A. thaliana* Polyubiquitin 10 (*UBQ10*) gene was used for normalization (reference) and centered to the mean Ct calculated for the 3 biological replicates. The *Lhcb1\*1* plus *Lhcb1\*2* primers were:

5'-TCTCACTACAAGTTAGTC-3' and 5'-TGTCACACG-GCCGCTTCCA-3'.

The *BLH1* primers were:

5'-CACGATGAAGATTCTAGAACGGCAAGGG-3'

5'-CGGTTTCTCCTTCGAGAGAGATGGGTTTATGC-3'.

Analysis of *BLH1* expression in transgenic plants bearing the full-length promoter fused to GUS. The full-length *BLH1* promoter including the 5'-UTRs of 2.5 kb (-1800 to +725) was PCR-amplified using the genomic DNA of *A. thaliana* accession Columbia as template with primers 5'-*Hind*III 5'-CCGAAGCTTCATGAACTTAAACACTCTTTGC and 3'-*Bam*H1 5'-CCGGGATCCTGTTACACACGAATGAAAACGAC.

The amplified promoter fragment was cloned into the CHF1 vector in the *Hind*III-*Bam*H1 sites. Plant transformation and GUS measurements were as described above. For in vivo GUS staining transgenic seedling were incubated at 37 °C for 60 min in staining solution as described (6).

**Analysis of Microarray Data.** Microarray data were standardized to the sum of all of the values of each microarray (7) and analyzed by factorial ANOVA with *BLH1/blh1* and FR/dark as main factors. We selected the genes showing significant effects of treatments at *P* < 0.05, a false discovery rate (8) *q* < 0.03 and a “present” flag in the 2 samples of at least 1 condition. Within these genes, we selected and used for clustering (9) 518, showing significant interaction between the main factors (*P* < 0.05). Of these genes, 287 formed 9 clusters with a required probability of genes belonging to cluster of 0.75 and a minimum of 14 genes. Five of the 9 clusters (214 of the 287 genes) showed reduced response to FR in the mutant and were used in subsequent functional analysis. Functional classification was conducted according to (10). For this purpose, the 3 clusters with expression promoted by continuous FR were grouped, and the same procedure was applied to the 2 clusters showing reduced expression in response to continuous FR.

**Analysis of Overrepresented Sequences.** Genes were selected when the effects of treatments were significant (*P* < 0.05, *q* < 0.03), the effect of *blh1* and/or the interaction between *blh1* and FR treatment was significant (*P* < 0.05), and the expression ratio between the mutant and the WT is >1.2 or <0.8 (using more stringent mutant to WT ratios does not change the conclusions). A 6-bp frame defines 3 possible sequences of the promoter that contain the TGGG motif: GATGGA, ATGGAT, and TG-GATT. We analyzed the promoter elements (500 bp upstream of the start codon) of the selected genes using the “Motif Analysis in Promoter/Upstream Sequences” tool available at the TAIR web site ([www.arabidopsis.org](http://www.arabidopsis.org)) to investigate if these 3 6-bp sequences were overrepresented.

1. Jefferson RA, Kavanagh TA, Bevan M (1987) GUS fusions: Glucuronidase as a sensitive and versatile gene fusion marker in higher plants. *EMBO J* 6:3901–3907.
2. Clough SJ, Bent AF (1998) Floral dip: A simplified method for *Agrobacterium*-mediated transformation of *Arabidopsis thaliana*. *Plant J* 16:735–743.
3. Green PJ, Kay SA, Chua NH (1987) Sequence-specific interactions of a pea nuclear factor with light-responsive elements upstream of the *RbcS-3A* gene. *EMBO J* 6:2453–2459.
4. Kim J, Harter K, Theologis A (1997) Protein-protein interactions among the Aux/IAA proteins. *Proc Natl Acad Sci USA* 94:11786–11791.
5. Livak KJ, Schmittgen TD (2001) Analysis of relative gene expression data using real time quantitative PCR and the 2<sup>-ΔΔCt</sup> method. *Methods* 25:402–408.
6. Lariguet P, et al. (2003) A growth regulatory loop that provides homeostasis to phytochrome A signaling. *Plant Cell* 15:2966–2978.
7. Clarke JD, Zhu T (2006) Microarray analysis of the transcriptome as a stepping stone towards understanding biological systems: Practical considerations and perspectives. *Plant J* 45:630–650.
8. Storey JD, Tibshirani R (2003) Statistical significance of genomewide studies. *Proc Natl Acad Sci USA* 100:9440–9445.
9. De Smet F, et al. (2002) Adaptive quality-based clustering of gene expression profiles. *Bioinformatics* 18:735–746.
10. Provart N, Zhu T (2003) A browser-based functional classification SuperViewer for *Arabidopsis* genomics. *Curr Comp Mol Biol* 2003:271–272.
11. Jiao Y, Ma L, Strickland E, Deng XW (2005) Conservation and divergence of light-regulated genome expression patterns during seedling development in rice and *Arabidopsis*. *Plant Cell* 17: 3239–3256.
12. Hoth S, Morgante M, Sanchez J-P, Hanafey MK, Tingey SV, Chua N-H (2002) Genome-wide gene expression profiling in *A. thaliana* reveals targets of abscisic acid and largely impaired gene regulation in the *abi-1* mutant. *J Cell Sci* 115:4891–4900.
13. Staneloni RJ, Rodriguez-Batiller MJ, Casal JJ (2008) Abscisic acid, high-light, and oxidative stress down-regulate a photosynthetic gene via a promoter motif not involved in phytochrome-mediated transcriptional regulation. *Mol Plant* 1:75–83.
14. Pagnussat GC, Yu HJ, Sundaresan V (2007) Cell-fate switch of synergid to egg cell in *Arabidopsis* *eostre* mutant embryo sacs arises from misexpression of the BEL1-like homeodomain gene BLH1. *Plant Cell* 19:3578–3592.

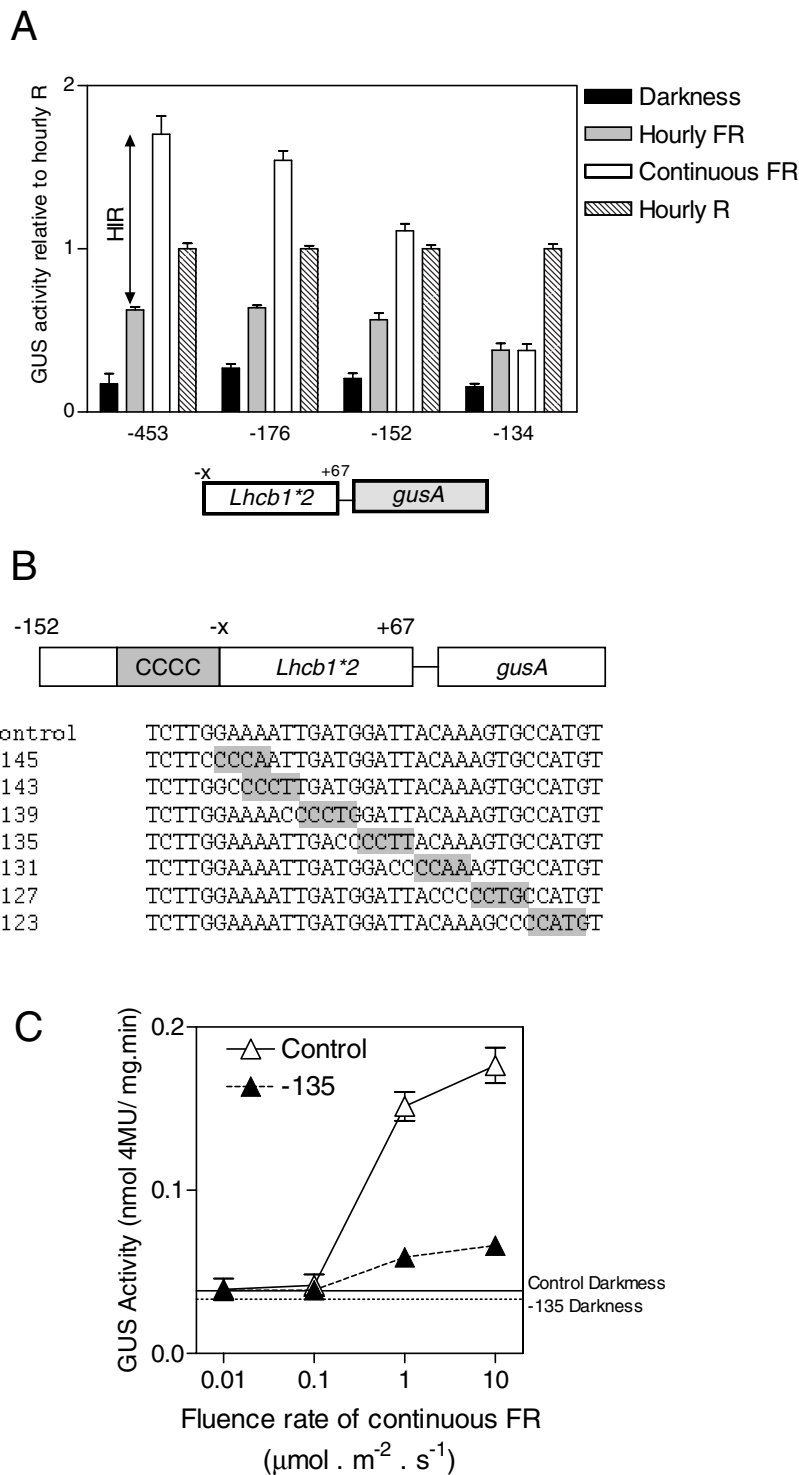

**Fig. S1.** *Lhcb1\*2* promoter deletion from  $-453$  to  $-134$  eliminates the HIR. (A) Etiolated seedlings were exposed to hourly pulses of FR, continuous FR, or hourly pulses of R or remained as dark controls. Data are means and SE of at least 5 independent transgenic lines. For each line, activity was normalized to the values under R pulses [average GUS activity, (nmol 4-MU  $\text{mg}^{-1} \text{min}^{-1}$ )  $\pm$  SE under R:  $-453 = 1.39 \pm 0.09$ ;  $-176 = 1.07 \pm 0.07$ ;  $-152 = 1.06 \pm 0.08$ ;  $-134 = 1.08 \pm 0.08$ ]. (B) Promoter substitutions used in Fig. 1A. (C) Reduced dependency of the  $-135$  *Lhcb1\*2* promoter activity on the fluence rate of continuous FR. Data are means and SE of 3 replicate samples from 1 control and 1  $-135$  transgenic lines selected for their similar levels of expression in darkness. Two-way ANOVA followed by Bonferroni post-tests indicates significant differences between promoters ( $P < 0.001$ ) for 1 and  $10 \mu\text{mol m}^{-2} \text{s}^{-1}$ . Other independent transgenic lines bearing the  $-135$  *Lhcb1\*2* promoter also showed severely reduced fluence rate dependency.

**A**

```

      *          20          *          40          *
Np-2. : ttggaaaattgatggatttacaagtgccat--gtcaacaagaac-taatgctaa : 51
Np-5. : aactttgccaaatggac--aagaatgcaaaaggttaaattgc----- : 41
At-1. : acaaatgctggaggactagagattgcac---gtaagactactaaacgataaaa : 51
Pe-5. : taggaagactcatggattatacaaccacaa--gtacacaacaca-taacgctaa : 51
Pe-6. : cactttgacaaatggac--aagaatgcaa-acgttaaacaattggt----- : 44
Pe-7. : acttttgccaaatggaa--aataatgcaaa-ggtt--acaaattatc----- : 42
Pe-1. : gaggaagactgatggattatagaacgacaa--gtaga-caagacataacgctaa : 51
St-2. : ctggaaaattgatggattggagatgctaaa-tgtgcataatt----gctacaa : 48
Le-1. : catcatgcagattggagattgccaa-----gtgcattaat----cgctacac : 43
Le-3. : tgtaaattggtggactaagagattgccaa-gtagcattactt---gctgtat : 50
Le-2. : tgaagaagtgatggattatagattgccaaagtgtgctac-----ac : 41
Ns-3. : ttggaaaattgatggactagagatcgccaa--gtgcatcaactgctgcta- : 51
      TGGA      a a      GT

      60          *          80          *          100
Np-2. : taa-aatcttgaaacccaatgaaattgtagatagagatatc--ataagataaga : 102
Np-5. : ----aatc-ca----ccaattgaaaagttagatatagatactc-a-aggataagg : 84
At-1. : caaaaatcttaaaatccaatgaatgaacagataaaaagattac-ttcagataata : 104
Pe-5. : tgg--atcttgaaacccaatgaaattgtagatagagatatc--ataagataaga : 101
Pe-6. : ----atctt-----ccaatgagaaaacagataatgatattcta--agataatg : 86
Pe-7. : ----atc-ca----ccaatgagaaaacagataatgatattca-aggataagg : 85
Pe-1. : tgg-aatcttgaaacccaatgaaattgtagatagagatat--cataagataaga : 102
St-2. : gtaggatcttgatagccaatgagatcatagatatagatttc--actagataagg : 100
Le-1. : atgggatcttgataccaatgagattatagatatagatatc--actagataatt : 95
Le-3. : atgggatcttgataccaatgagatcataaatatagatatc--actagataagg : 102
Le-2. : atgggatcttgataccaatgagatcatacatatagatatc--acttgataaga : 93
Ns-3. : t-ggaatcttgataccaatgagatcatagatatagatatc--acaggataagg : 102
      ATCTt      CCAATga a      A ata agat t      a      GATAa
  
```

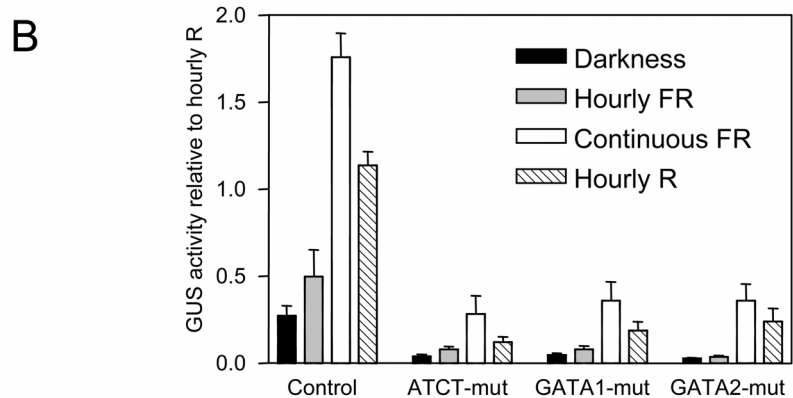

**B**

| Motifs           | AAAA ATCT   | CCAAT      | G ATA III  | GATA II    | GATA I         |
|------------------|-------------|------------|------------|------------|----------------|
| WT promoter -100 | ATAAAAATCTT | GAAACCCAAT | GAAATTGTAG | ATAGAGATAT | CATAAGATAA -51 |
| ATCT-mut         | GAATT C     |            |            |            |                |
| GATA 1-mut       |             |            | TCTAGA     |            |                |
| GATA 2-mut       |             |            |            | GGTACC     |                |

**Fig. S2.** The TGGA motif in the context of other sequences involved in the control of gene expression by light. (A) Presence and relative position of the TGGA motif in the promoters of *Lhcb* genes from *Nicotiana plumbaginifolia* (Np), *Arabidopsis thaliana* (At), *Petunia* (Pe), *Solanum tuberosum* (St), *Solanum lycopersicon* (Le), and *Nicotiana sylvestris*. The number given after the species abbreviation completes the denomination *Lhcb1\*<sub>n</sub>*. (B) Mutations of other motifs of the *Lhcb1\*2* promoter with large effects on light responses do not eliminate the HIR (i.e., the differential effect of hourly and continuous FR). Data are means and SE from 3 independent transgenic lines for each promoter.

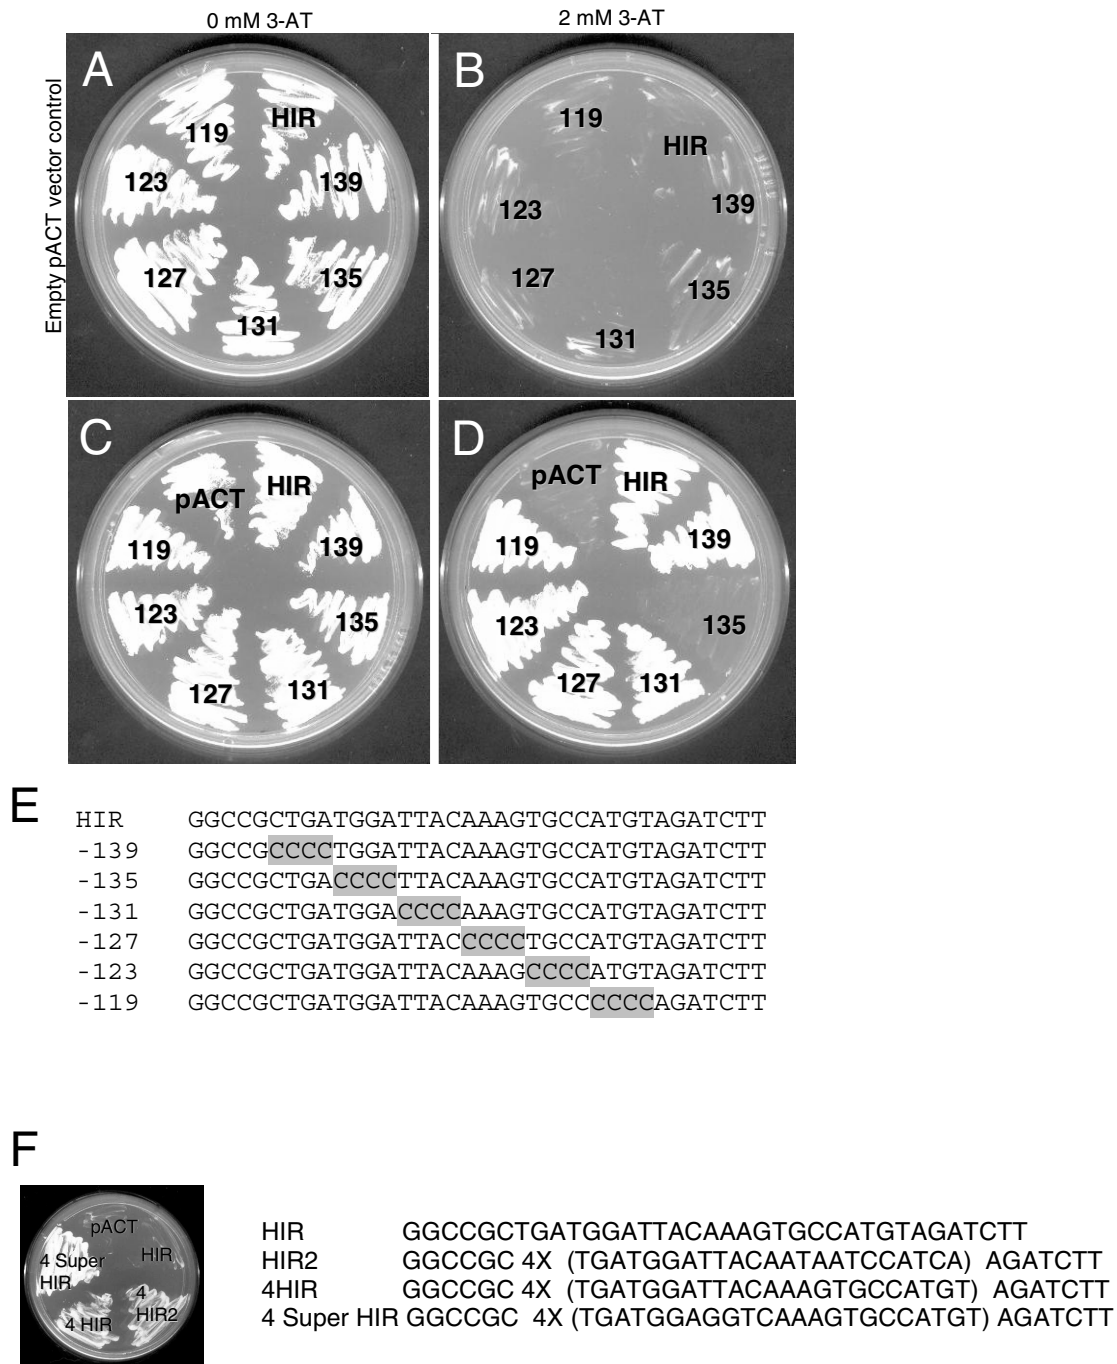

**Fig. S3.** Controls of the yeast-1-hybrid experiment shown in Fig. 1*B* (relevant Fig. 1*B* data are repeated here for completeness) and DNA sequences used as bait reporter strains. (*A*) Yeast strains transformed with an empty pACT vector grow in medium lacking histidine. (*B*) Yeast strains transformed with an empty pACT vector fail to grow in medium lacking histidine in the presence of 2 mM 3-AT. (*C*) Yeast strains transformed with pACT-BLH1 grow in the absence of histidine. (*D*) Yeast strains transformed with pACT-BLH1 fail to grow in the absence of histidine and the presence of 2 mM 3-AT if the bait reporter construct carries a TGGA to CCCC substitution between -138 and -135 bp. (*E*) DNA sequences used in the bait reporter strains. (*F*) Enhanced binding of the Super HIR sequence.

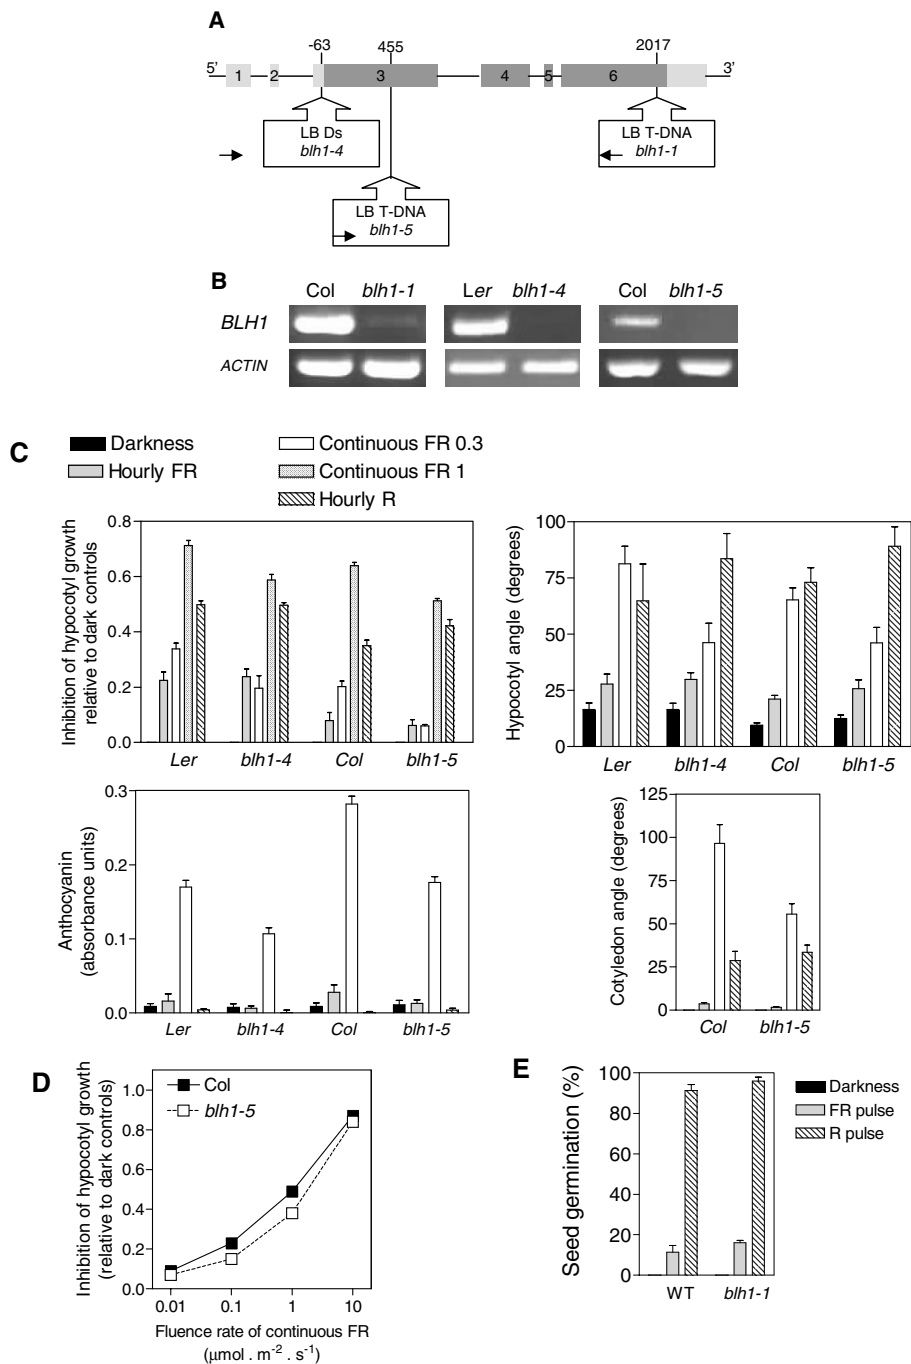

**Fig. S4.** Deficient HIR and normal VLFR in *blh1* mutants. (A) *blh1* mutant alleles: Position and orientation of the T-DNA insert (arrowed box) in the *blh1* (At2g35940) alleles. The genomic regions surrounding the insertions were sequenced to confirm the position. Lines represent introns, and boxes indicate exons (lighter fill correspond to 5' and 3' UTR). LB, left border junction sequence. (B) Expression of *BLH1* determined by RT-PCR. Seedlings were grown for 3 days in darkness followed by 6 h under continuous FR before harvest. (C) Hypocotyl growth inhibition relative to the length in dark controls (the mutations did not affect hypocotyl length in darkness), hypocotyl angle, anthocyanin levels, and cotyledon angle in additional alleles of *blh1*. The VLFR pathway contributes significantly to cotyledon unfolding under continuous or pulsed FR in the Landsberg erecta background, therefore the HIR of cotyledon unfolding was not tested in *blh1-4*. One-day-old seedlings were grown for 3 days under various light conditions before measurements. Data are means and SE of 3–4 replicate boxes. (D) Fluence response curve of hypocotyl growth inhibition under continuous FR. ANOVA followed by Bonferroni post-tests indicate significant effects of *blh1* under 0.1 ( $P < 0.05$ ) and 1 ( $P < 0.001$ )  $\mu\text{mol m}^{-2} \text{s}^{-1}$ . (E) Normal VLFR of seed germination in *blh1* (seed germination shows no HIR in *Arabidopsis* and germination in darkness was nil). For germination tests, 25 seeds per box were sown on agar, given a pulse of long-wavelength FR, incubated 5 days in darkness at 4 °C, transferred to 22 °C, and (1 h later) given a 5-min pulse of long-wavelength FR or of R, or left as dark controls, and incubated 3 days in darkness before counting germinated seeds. Data are means and SE of 3 replicate boxes.

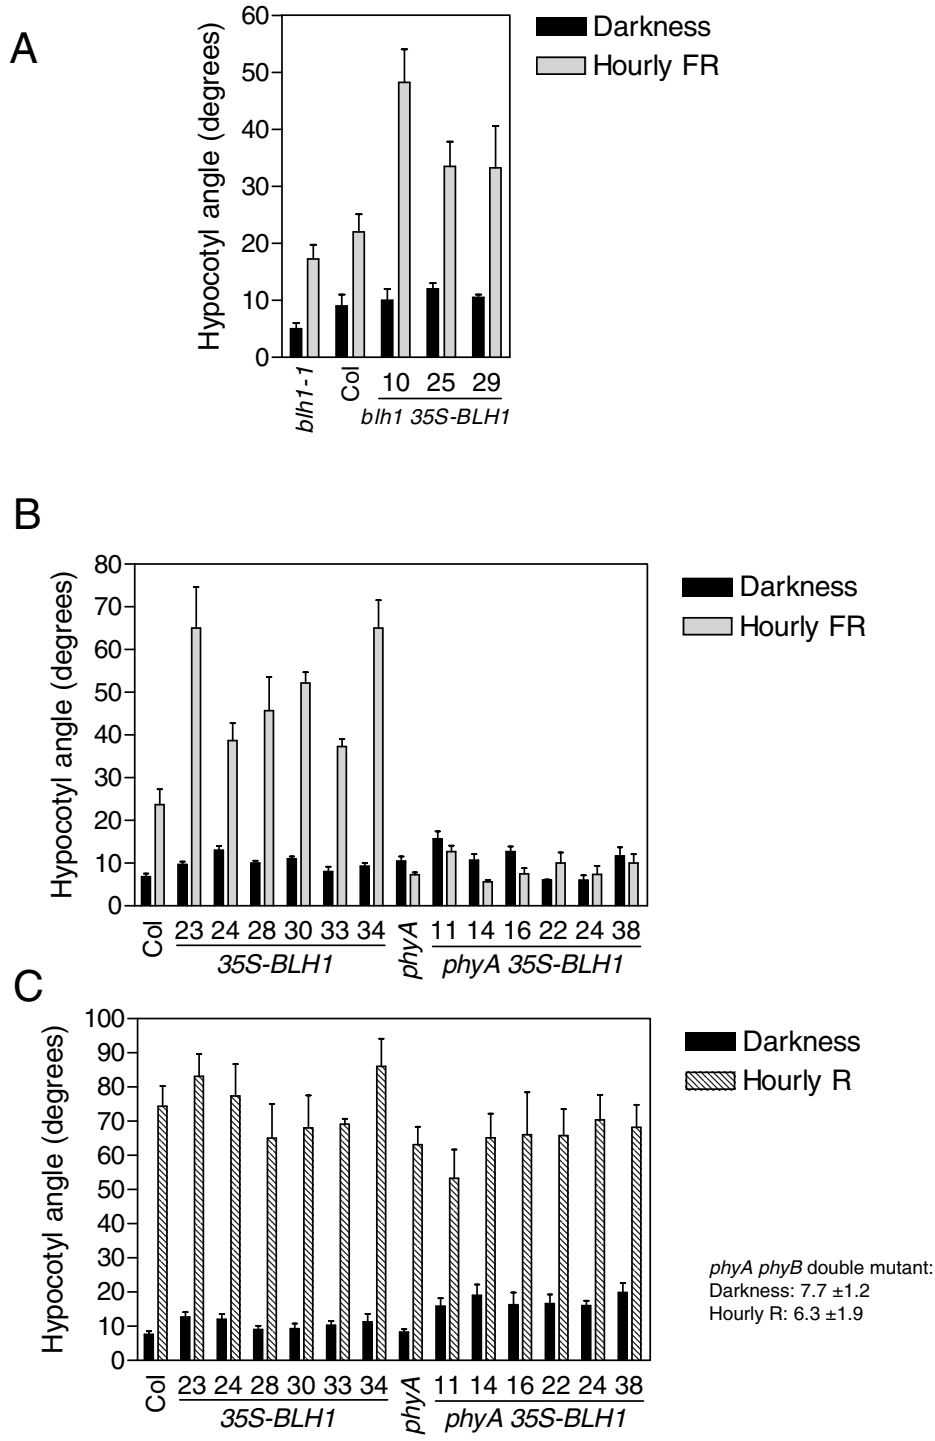

**Fig. S5.** Overexpression of *BLH1* enhances the response to hourly pulses of FR. (A) Overexpression of *BLH1* enhances hypocotyl angle under hourly pulses of FR. One-day-old seedlings were grown for 3 days either in darkness or under hourly pulses of FR before measurements. The transgenic lines show higher response to pulses of FR than the WT Col ( $P < 0.05$ ). Data are means and SE of 3 replicate boxes. (B) *BLH1* enhances hypocotyl angle under hourly pulses of FR when overexpressed in the WT Col background but not when overexpressed in the *phyA* mutant background. Each number in the x axis indicates an independent transgenic line. One-day-old seedlings were grown for 3 days either in darkness or under hourly pulses of FR before measurements. Data are means and SE of 3 replicate boxes. All of the transgenic lines in the WT Col background show significantly higher hypocotyl angle ( $P < 0.01$ ) than the WT under hourly pulses of FR and normal angle in darkness. (C) Overexpression of *BLH1* has no effect under hourly pulses of red light.

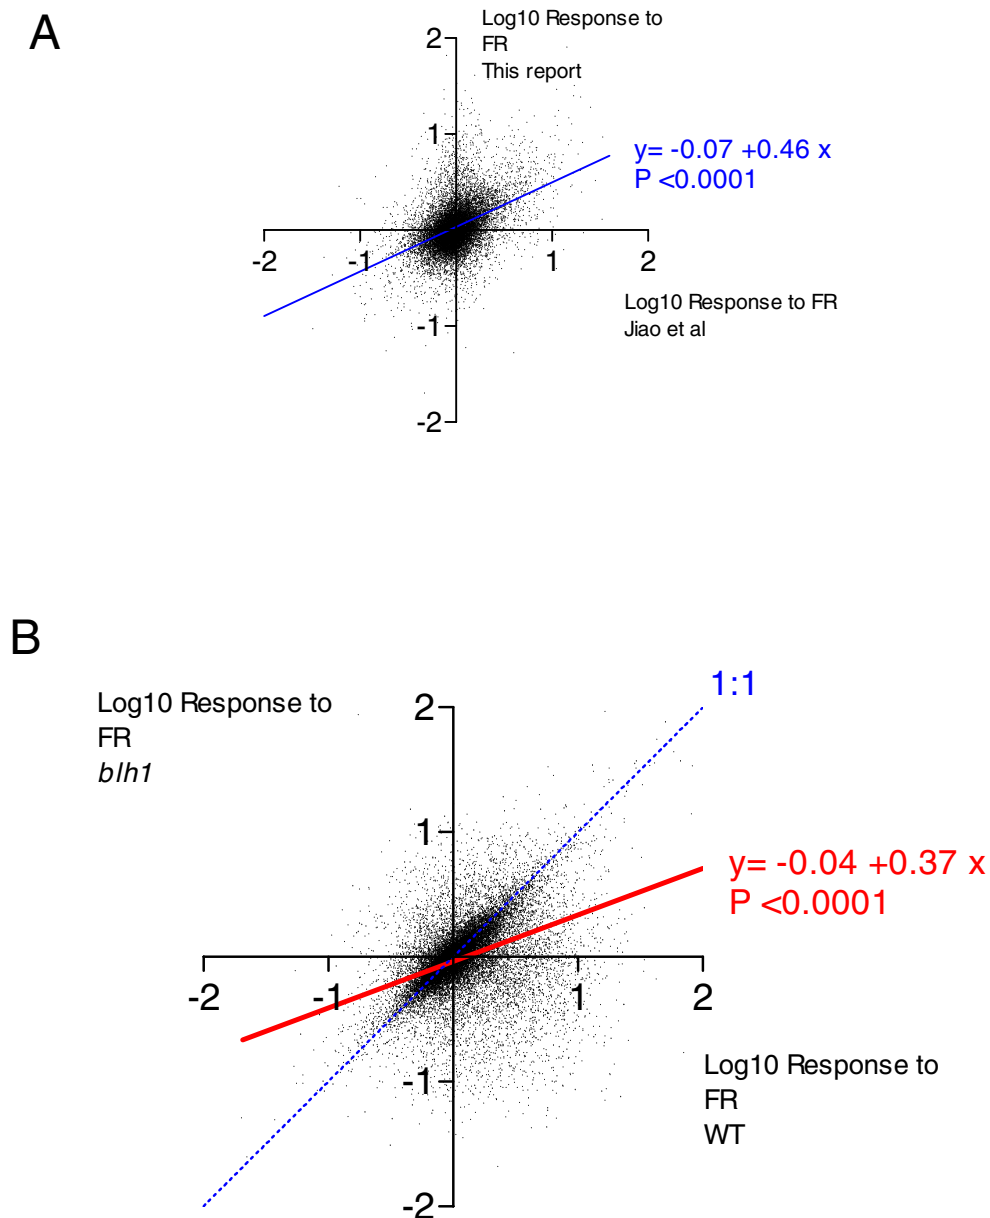

**Fig. S6.** Overview of the microarray data. (A) High coincidence of the microarray data presented here and those published by Jiao et al. (11). The  $\log_{10}$  of the ratio between the expression under continuous FR and in darkness was calculated for all of the genes present in both microarray platforms (Affymetrix). ATH1 used here and the 70-mer oligonucleotide microarray based on 26,090 unique 70-mer oligonucleotides of the *Arabidopsis* Genome Oligo Set version 1.0, Operon used by Jiao et al. (11). Despite the different growth media and the very different time frames (in the current work the seedlings were grown on agar and exposed to FR for only 6 h, while Jiao et al. (11) present data from seedlings grown on agar plus sucrose for 6 days under FR), there is a strong overlap indicated by the highly significant positive correlation between the response to FR in each study. (B) The overview of the *blh1-1* transcriptome phenotype indicates an average 60% reduction in the response to 6 h of continuous FR ( $60 \mu\text{mol m}^{-2} \text{s}^{-1}$ ) compared to the Col WT. The  $\log_{10}$  of the ratio between the expression under continuous FR and in darkness was calculated for WT and *blh1* for all of the genes present in the microarray. The slope of the relationship is significant, indicating that the genes that respond to FR (promotion or inhibition) in both genotypes tend to be the same. However, the slope (0.37) is significantly lower than 1 ( $P < 0.001$ ), indicating that the average extent of response is much weaker in the mutant.







**Table S1. Clusters of genes with reduced response to continuous FR (6 h, 60  $\mu$ mol m<sup>-2</sup> s<sup>-1</sup>) in the *blh1-1* mutant**

| Cluster | Locus     | Descriptions                                                        | Darkness |             |      |      | Continuous FR |             |      |        | Statistics |          |                   | TGGA |
|---------|-----------|---------------------------------------------------------------------|----------|-------------|------|------|---------------|-------------|------|--------|------------|----------|-------------------|------|
|         |           |                                                                     | WT       | <i>blh1</i> |      |      | WT            | <i>blh1</i> |      |        | <i>P</i>   | <i>q</i> | <i>P</i> (inter.) |      |
| I       | AT1G12900 | putative calcium-binding protein, calreticulin                      | 420      | 434         | 394  | 364  | 3765          | 3869        | 3002 | 2926   | 1.8E-13    | 3.9E-10  | 2.7E-04           |      |
| I       | AT4G03100 | putative rac GTPase activating protein                              | 35       | 31          | 31   | 30   | 146           | 154         | 101  | 100    | 4.6E-11    | 2.0E-08  | 3.9E-04           | +    |
| I       | AT5G46420 | unknown protein                                                     | 219      | 238         | 249  | 245  | 439           | 450         | 358  | 354    | 1.1E-09    | 9.4E-08  | 6.9E-04           | +    |
| I       | AT2G04039 | predicted protein                                                   | 115      | 113         | 103  | 100  | 220           | 225         | 167  | 153    | 4.9E-09    | 2.4E-07  | 2.7E-03           | +    |
| I       | AT3G10050 | threonine dehydratase/deaminase (OMR1)                              | 64       | 66          | 61   | 69   | 185           | 188         | 141  | 149    | 6.0E-10    | 7.4E-08  | 2.8E-03           | +    |
| I       | AT1G18730 | unknown protein                                                     | 117      | 147         | 153  | 130  | 466           | 448         | 332  | 324    | 5.4E-09    | 2.5E-07  | 3.0E-03           | +    |
| I       | AT2G34460 | unknown protein                                                     | 71       | 59          | 80   | 78   | 340           | 321         | 277  | 270    | 1.7E-10    | 3.8E-08  | 4.1E-03           | +    |
| I       | AT3G04870 | putative zeta-carotene desaturase precursor                         | 255      | 243         | 247  | 258  | 548           | 568         | 474  | 451    | 9.6E-10    | 9.1E-08  | 4.5E-03           | +    |
| I       | AT1G14120 | dioxygenase-like protein                                            | 187      | 198         | 210  | 184  | 391           | 384         | 313  | 304    | 1.5E-08    | 4.2E-07  | 4.7E-03           | +    |
| I       | AT3G15520 | hypothetical protein                                                | 75       | 72          | 78   | 67   | 247           | 227         | 170  | 177    | 8.2E-09    | 3.1E-07  | 5.9E-03           | +    |
| I       | AT3G61870 | hypothetical protein                                                | 169      | 194         | 157  | 197  | 926           | 934         | 699  | 606    | 6.8E-09    | 2.8E-07  | 6.5E-03           | +    |
| I       | AT1G02080 | unknown protein                                                     | 395      | 412         | 419  | 400  | 602           | 618         | 539  | 523    | 3.0E-08    | 6.8E-07  | 7.3E-03           | +    |
| I       | AT4G17000 | hypothetical protein                                                | 11       | 9           | 18   | 21   | 56            | 56          | 45   | 36     | 5.4E-07    | 4.5E-06  | 8.9E-03           | +    |
| I       | AT1G18060 | unknown protein                                                     | 115      | 126         | 99   | 111  | 488           | 510         | 408  | 382    | 2.9E-10    | 4.9E-08  | 9.1E-03           | +    |
| I       | AT5G05390 | laccase (diphenol oxidase)                                          | 7        | 11          | 8    | 13   | 46            | 42          | 29   | 28     | 2.2E-07    | 2.6E-06  | 9.6E-03           | +    |
| I       | AT5G47840 | putative protein contains similarity to adenylate kinase            | 291      | 321         | 293  | 277  | 619           | 617         | 509  | 527    | 1.4E-09    | 1.1E-07  | 1.4E-02           | +    |
| I       | AT5G01530 | chlorophyll a/b-binding protein CP29                                | 1740     | 1825        | 1921 | 1718 | 5827          | 6168        | 5211 | 5118   | 2.7E-10    | 4.8E-08  | 1.4E-02           | +    |
| I       | AT1G71500 | unknown protein                                                     | 345      | 343         | 398  | 394  | 673           | 702         | 630  | 664    | 3.3E-09    | 2.0E-07  | 1.4E-02           | +    |
| I       | AT2G31400 | unknown protein                                                     | 396      | 429         | 411  | 373  | 1185          | 1145        | 1010 | 974    | 2.3E-10    | 4.8E-08  | 1.4E-02           | +    |
| I       | AT5G29771 | ribosomal protein S1                                                | 1130     | 1197        | 1056 | 1161 | 2700          | 2621        | 2220 | 2298   | 7.3E-10    | 8.0E-08  | 1.4E-02           |      |
| I       | AT2G42600 | phosphoenolpyruvate carboxylase                                     | 350      | 341         | 354  | 318  | 780           | 748         | 629  | 654    | 3.0E-09    | 1.9E-07  | 1.5E-02           | +    |
| I       | AT4G02770 | putative photosystem I reaction center subunit II precursor         | 929      | 942         | 1054 | 923  | 3790          | 3742        | 3494 | 3362   | 1.1E-11    | 9.4E-09  | 1.5E-02           | +    |
| I       | AT2G45770 | putative signal recognition particle receptor (alpha subunit)       | 68       | 65          | 64   | 72   | 185           | 169         | 131  | 142    | 7.9E-08    | 1.3E-06  | 1.7E-02           | +    |
| I       | AT1G27120 | unknown protein                                                     | 44       | 52          | 49   | 52   | 114           | 103         | 83   | 74     | 1.9E-06    | 1.1E-05  | 1.7E-02           | +    |
| I       | AT4G02530 | predicted protein                                                   | 219      | 230         | 205  | 229  | 809           | 814         | 743  | 715    | 7.9E-12    | 8.6E-09  | 1.8E-02           | +    |
| I       | AT4G16985 | Expressed protein                                                   | 336      | 293         | 265  | 357  | 1938          | 1970        | 1528 | 1675   | 6.6E-10    | 7.8E-08  | 1.8E-02           |      |
| I       | AT4G18240 | starch synthase-like protein                                        | 92       | 100         | 102  | 105  | 169           | 176         | 156  | 146    | 1.2E-07    | 1.7E-06  | 1.8E-02           | +    |
| I       | AT3G47470 | CHLOROPHYLL A-B BINDING PROTEIN 4 PRECURSOR (LHCI TYPEIII CAB-4)    | 1113     | 1083        | 1211 | 1142 | 5792          | 6045        | 5292 | 4888   | 2.8E-10    | 4.8E-08  | 2.0E-02           | +    |
| I       | AT5G37310 | multispanning membrane protein                                      | 164      | 169         | 183  | 167  | 236           | 241         | 215  | 215    | 7.4E-07    | 5.6E-06  | 2.1E-02           | +    |
| I       | AT5G13410 | putative protein peptidyl-prolyl cis-trans isomerase                | 108      | 94          | 92   | 91   | 235           | 211         | 164  | 159    | 3.2E-07    | 3.2E-06  | 2.1E-02           | +    |
| I       | AT5G51560 | receptor-like protein kinase                                        | 146      | 146         | 142  | 143  | 302           | 300         | 264  | 240    | 1.5E-08    | 4.2E-07  | 2.1E-02           | +    |
| I       | AT5G39210 | hypothetical protein                                                | 80       | 91          | 84   | 95   | 151           | 141         | 114  | 118    | 6.5E-06    | 2.6E-05  | 2.3E-02           | +    |
| I       | AT1G74730 | unknown protein                                                     | 131      | 197         | 126  | 154  | 1582          | 1332        | 1396 | 15E-11 | 1.1E-08    | 2.3E-02  | +                 |      |
| I       | AT1G73590 | auxin transporter splice variant b                                  | 34       | 38          | 29   | 46   | 104           | 99          | 65   | 71     | 3.5E-06    | 1.6E-05  | 2.4E-02           | +    |
| I       | AT4G25080 | magnesium-protoporphyrin IX methyltransferase - like protein        | 707      | 653         | 684  | 627  | 1588          | 1638        | 1418 | 1426   | 2.7E-10    | 4.8E-08  | 2.4E-02           | +    |
| I       | AT1G50450 | hypothetical protein                                                | 64       | 75          | 65   | 84   | 281           | 235         | 165  | 177    | 2.0E-06    | 1.1E-05  | 2.4E-02           | +    |
| I       | AT1G20810 | putative FKBP-type peptidyl-prolyl cis-trans isomerase              | 115      | 86          | 108  | 112  | 227           | 214         | 170  | 142    | 1.9E-05    | 5.7E-05  | 2.6E-02           | +    |
| I       | AT1G66430 | putative similar to fructokinase                                    | 114      | 119         | 114  | 133  | 272           | 253         | 224  | 216    | 1.1E-07    | 1.7E-06  | 2.6E-02           | +    |
| I       | AT4G14210 | phytoene dehydrogenase precursor (phytoene desaturase)              | 201      | 252         | 221  | 201  | 600           | 556         | 450  | 435    | 1.1E-07    | 1.7E-06  | 2.8E-02           | +    |
| I       | AT3G56010 | putative protein CHLOROPLAST 30S RIBOSOMAL PROTEIN S20              | 160      | 207         | 209  | 206  | 316           | 338         | 250  | 267    | 4.1E-05    | 9.8E-05  | 2.8E-02           | +    |
| I       | AT4G24120 | putative protein                                                    | 29       | 29          | 29   | 24   | 56            | 55          | 43   | 44     | 2.5E-07    | 2.7E-06  | 2.9E-02           | +    |
| I       | AT2G41820 | putative receptor-like protein kinase                               | 178      | 192         | 199  | 185  | 312           | 315         | 271  | 236    | 5.7E-06    | 2.4E-05  | 3.0E-02           | +    |
| I       | AT4G34240 | putative aldehyde dehydrogenase aldehyde dehydrogenase (NAD+)       | 150      | 137         | 120  | 124  | 305           | 278         | 221  | 203    | 3.3E-07    | 3.3E-06  | 3.0E-02           | +    |
| I       | AT5G17170 | unknown protein                                                     | 342      | 352         | 325  | 328  | 864           | 784         | 667  | 603    | 1.7E-07    | 2.2E-06  | 3.0E-02           | +    |
| I       | AT4G12310 | flavonoid 3,5-hydroxylase -like protein                             | 31       | 44          | 34   | 35   | 111           | 121         | 85   | 80     | 3.7E-07    | 3.5E-06  | 3.1E-02           | +    |
| I       | AT1G67740 | putative photosystem II Core Complex                                | 1015     | 1020        | 995  | 1141 | 3319          | 3151        | 2924 | 2929   | 2.7E-10    | 4.8E-08  | 3.2E-02           | +    |
| I       | AT1G63420 | hypothetical protein                                                | 61       | 58          | 51   | 63   | 112           | 111         | 89   | 79     | 2.9E-06    | 1.4E-05  | 3.4E-02           | +    |
| I       | AT4G36180 | putative receptor protein kinase Cf-2.1 leucine rich repeat protein | 74       | 91          | 95   | 85   | 200           | 190         | 167  | 169    | 9.8E-08    | 1.6E-06  | 3.7E-02           | +    |
| I       | AT4G39970 | putative protein                                                    | 99       | 131         | 116  | 114  | 270           | 296         | 220  | 194    | 2.8E-06    | 1.4E-05  | 3.7E-02           | +    |
| I       | AT2G30950 | FtsH protease (VAR2) identical to zinc dependent protease           | 674      | 631         | 631  | 670  | 1959          | 1857        | 1694 | 1547   | 7.8E-09    | 3.0E-07  | 3.9E-02           | +    |
| I       | AT5G55520 | putative protein                                                    | 12       | 4           | 25   | 9    | 77            | 68          | 53   | 52     | 4.2E-06    | 1.9E-05  | 4.0E-02           | +    |
| I       | AT1G07880 | MAP kinase, putative                                                | 10       | 11          | 10   | 9    | 33            | 35          | 26   | 20     | 1.6E-06    | 9.5E-06  | 4.1E-02           | +    |
| I       | AT4G30950 | chloroplast omega-6 fatty acid desaturase (fad6)                    | 1184     | 1266        | 1168 | 1141 | 2132          | 2079        | 1886 | 1880   | 7.5E-10    | 8.0E-08  | 4.1E-02           | +    |
| I       | AT2G46820 | unknown protein                                                     | 736      | 801         | 777  | 784  | 1974          | 2024        | 1867 | 1758   | 5.9E-10    | 7.4E-08  | 4.4E-02           | +    |

|     |           |                                                                                        | Darkness |     |     |     | Continuous FR |      |      |      | Statistics |         |         |   |
|-----|-----------|----------------------------------------------------------------------------------------|----------|-----|-----|-----|---------------|------|------|------|------------|---------|---------|---|
| I   | AT5G19370 | peptidyl-prolyl cis-trans isomerase - like protein                                     | 246      | 309 | 287 | 321 | 587           | 557  | 480  | 492  | 1.3E-06    | 8.1E-06 | 4.5E-02 | + |
| I   | AT5G51010 | unknown protein                                                                        | 270      | 318 | 301 | 330 | 746           | 688  | 630  | 600  | 1.2E-07    | 1.7E-06 | 4.6E-02 | + |
| I   | AT3G01500 | carbonic anhydrase, chloroplast precursor                                              | 402      | 398 | 270 | 345 | 5807          | 6073 | 5057 | 4265 | 8.0E-09    | 3.1E-07 | 4.7E-02 | + |
| I   | AT5G04140 | ferredoxin-dependent glutamate synthase                                                | 210      | 234 | 178 | 189 | 1505          | 1329 | 1133 | 1002 | 4.3E-08    | 9.1E-07 | 4.8E-02 | + |
| I   | AT4G28680 | aromatic amino-acid decarboxylase - like protein<br>tryptophan decarboxylase           | 17       | 14  | 17  | 20  | 84            | 77   | 69   | 56   | 3.3E-07    | 3.3E-06 | 4.8E-02 | + |
| I   | AT2G20020 | hypothetical protein                                                                   | 40       | 48  | 45  | 49  | 87            | 104  | 74   | 67   | 2.7E-05    | 7.2E-05 | 4.8E-02 |   |
| I   | AT5G35210 | putative protein                                                                       | 193      | 210 | 200 | 184 | 445           | 430  | 390  | 387  | 8.9E-10    | 8.8E-08 | 4.8E-02 | + |
| I   | AT5G02830 | putative protein                                                                       | 28       | 6   | 38  | 33  | 217           | 156  | 118  | 107  | 3.3E-05    | 8.3E-05 | 4.8E-02 | + |
| I   | AT2G32590 | hypothetical protein                                                                   | 17       | 21  | 18  | 14  | 81            | 84   | 65   | 52   | 3.3E-07    | 3.3E-06 | 4.8E-02 | + |
| I   | AT1G52230 | photosystem I subunit VI precursor                                                     | 587      | 689 | 583 | 505 | 5365          | 5108 | 4695 | 4367 | 1.5E-10    | 3.6E-08 | 4.9E-02 | + |
| II  | AT5G64840 | ABC transporter protein 1-like                                                         | 131      | 143 | 165 | 168 | 289           | 271  | 205  | 176  | 2.3E-06    | 1.2E-05 | 2.9E-03 |   |
| II  | AT1G28340 | unknown protein                                                                        | 192      | 184 | 203 | 192 | 306           | 285  | 215  | 192  | 7.5E-06    | 2.9E-05 | 4.2E-03 | + |
| II  | AT5G28300 | GTL1 - like protein GTL1                                                               | 259      | 244 | 273 | 255 | 322           | 324  | 272  | 261  | 2.4E-05    | 6.8E-05 | 6.0E-03 | + |
| II  | AT2G23840 | unknown protein                                                                        | 4        | 1   | 3   | 11  | 41            | 35   | 16   | 16   | 3.9E-06    | 1.8E-05 | 6.2E-03 | + |
| II  | AT1G60230 | hypothetical protein                                                                   | 41       | 39  | 50  | 43  | 72            | 75   | 60   | 55   | 2.4E-06    | 1.3E-05 | 6.3E-03 | + |
| II  | AT5G63780 | putative protein                                                                       | 226      | 242 | 213 | 211 | 459           | 414  | 293  | 288  | 4.0E-07    | 3.7E-06 | 6.8E-03 | + |
| II  | AT1G31460 | unknown protein                                                                        | 23       | 19  | 26  | 28  | 51            | 45   | 34   | 28   | 2.2E-05    | 6.2E-05 | 7.4E-03 | + |
| II  | AT5G47760 | 4-nitrophenylphosphatase-like protein                                                  | 94       | 105 | 109 | 102 | 130           | 127  | 104  | 99   | 1.4E-04    | 2.5E-04 | 8.6E-03 | + |
| II  | AT1G30210 | hypothetical protein contains similarity to cyc1A protein                              | 63       | 64  | 75  | 69  | 106           | 99   | 83   | 73   | 3.4E-05    | 8.6E-05 | 9.7E-03 | + |
| II  | AT1G04200 | unknown protein                                                                        | 101      | 99  | 104 | 104 | 139           | 131  | 114  | 103  | 4.3E-05    | 1.0E-04 | 1.1E-02 | + |
| II  | AT1G24706 | unknown protein                                                                        | 71       | 69  | 82  | 67  | 110           | 103  | 72   | 79   | 2.0E-04    | 3.2E-04 | 1.6E-02 | + |
| II  | AT3G20280 | hypothetical protein                                                                   | 28       | 32  | 27  | 38  | 65            | 58   | 33   | 39   | 1.3E-04    | 2.3E-04 | 1.9E-02 | + |
| II  | AT1G73970 | unknown protein                                                                        | 77       | 80  | 78  | 79  | 89            | 86   | 79   | 79   | 1.9E-04    | 3.1E-04 | 1.9E-02 | + |
| II  | AT4G08150 | KNAT1 homeobox-like protein                                                            | 307      | 304 | 374 | 314 | 522           | 492  | 419  | 376  | 5.9E-05    | 1.3E-04 | 2.0E-02 | + |
| II  | AT3G50790 | putative LEA protein <i>Picea glauca</i> late embryogenesis<br>abundant protein (EMB8) | 51       | 60  | 78  | 65  | 131           | 110  | 92   | 82   | 1.1E-04    | 2.1E-04 | 2.2E-02 | + |
| II  | AT3G16350 | putative MYB family transcription factor                                               | 29       | 19  | 26  | 32  | 44            | 51   | 26   | 29   | 7.4E-04    | 8.6E-04 | 2.4E-02 | + |
| II  | AT1G65950 | hypothetical protein contains similarity to ABC<br>transporter                         | 73       | 71  | 57  | 62  | 129           | 130  | 90   | 69   | 8.4E-06    | 3.2E-05 | 2.5E-02 | + |
| II  | AT2G20240 | unknown protein                                                                        | 38       | 46  | 50  | 41  | 78            | 72   | 48   | 55   | 1.7E-04    | 2.9E-04 | 2.7E-02 | + |
| II  | AT3G18390 | unknown protein                                                                        | 142      | 175 | 178 | 150 | 312           | 286  | 217  | 221  | 1.7E-05    | 5.2E-05 | 2.7E-02 | + |
| II  | AT1G22460 | hypothetical protein similar to axi 1-like protein                                     | 8        | 9   | 10  | 15  | 24            | 22   | 16   | 10   | 8.7E-04    | 9.8E-04 | 2.7E-02 | + |
| II  | AT2G44440 | hypothetical protein                                                                   | 69       | 89  | 80  | 98  | 166           | 145  | 104  | 74   | 6.9E-04    | 8.2E-04 | 2.8E-02 | + |
| II  | AT2G31530 | putative preprotein translocase SECY protein                                           | 57       | 65  | 62  | 65  | 97            | 86   | 67   | 71   | 2.1E-04    | 3.3E-04 | 3.1E-02 | + |
| II  | AT3G16260 | hypothetical protein                                                                   | 69       | 82  | 71  | 80  | 113           | 108  | 77   | 86   | 2.1E-04    | 3.3E-04 | 3.3E-02 | + |
| II  | AT5G40630 | putative protein                                                                       | 53       | 46  | 72  | 49  | 111           | 85   | 50   | 56   | 2.6E-03    | 2.3E-03 | 3.3E-02 | + |
| II  | AT3G43610 | putative protein gamma-tubulin interacting protein                                     | 95       | 92  | 82  | 96  | 161           | 172  | 118  | 85   | 1.8E-04    | 3.0E-04 | 3.4E-02 | + |
| II  | AT5G17250 | unknown protein                                                                        | 35       | 34  | 41  | 39  | 57            | 48   | 41   | 42   | 9.1E-04    | 1.0E-03 | 3.5E-02 | + |
| II  | AT4G21060 | putative protein                                                                       | 47       | 42  | 47  | 42  | 88            | 71   | 53   | 46   | 3.0E-04    | 4.3E-04 | 3.5E-02 | + |
| II  | AT1G63640 | kinesin-like protein                                                                   | 70       | 80  | 82  | 88  | 157           | 126  | 78   | 100  | 9.4E-04    | 1.0E-03 | 3.6E-02 | + |
| II  | AT2G24960 | hypothetical protein                                                                   | 32       | 18  | 40  | 38  | 80            | 66   | 55   | 38   | 7.4E-04    | 8.6E-04 | 3.6E-02 | + |
| II  | AT5G25580 | putative protein                                                                       | 20       | 22  | 17  | 23  | 43            | 38   | 26   | 20   | 2.0E-04    | 3.3E-04 | 3.6E-02 | + |
| II  | AT4G12980 | putative protein                                                                       | 68       | 60  | 68  | 60  | 135           | 112  | 86   | 78   | 8.9E-05    | 1.7E-04 | 3.6E-02 | + |
| II  | AT1G08960 | hypothetical protein                                                                   | 62       | 53  | 52  | 63  | 88            | 92   | 60   | 68   | 2.1E-04    | 3.4E-04 | 3.9E-02 | + |
| II  | AT1G06670 | DEIH-box RNA/DNA helicase                                                              | 87       | 105 | 100 | 108 | 156           | 148  | 95   | 122  | 1.1E-03    | 1.2E-03 | 4.0E-02 | + |
| II  | AT5G11380 | 1-D-deoxyxylulose 5-phosphate synthase - like protein                                  | 56       | 63  | 64  | 72  | 108           | 89   | 75   | 72   | 8.7E-04    | 9.7E-04 | 4.0E-02 | + |
| II  | AT4G32660 | protein kinase AME3                                                                    | 151      | 158 | 179 | 156 | 226           | 203  | 181  | 158  | 2.4E-03    | 2.1E-03 | 4.5E-02 | + |
| II  | AT1G55540 | hypothetical protein                                                                   | 28       | 35  | 37  | 36  | 73            | 56   | 32   | 44   | 2.0E-03    | 1.9E-03 | 4.6E-02 | + |
| II  | AT5G16180 | putative protein                                                                       | 36       | 44  | 40  | 35  | 72            | 68   | 52   | 42   | 9.2E-05    | 1.8E-04 | 4.6E-02 | + |
| II  | AT3G52640 | hypothetical protein                                                                   | 170      | 157 | 163 | 164 | 227           | 210  | 181  | 190  | 5.2E-05    | 1.2E-04 | 4.8E-02 | + |
| II  | AT1G53670 | transcriptional regulator                                                              | 228      | 266 | 304 | 261 | 627           | 488  | 396  | 347  | 2.9E-04    | 4.3E-04 | 4.8E-02 | + |
| III | AT3G14920 | hypothetical protein                                                                   | 142      | 146 | 156 | 157 | 186           | 177  | 146  | 138  | 8.8E-06    | 3.3E-05 | 1.3E-03 | + |
| III | AT1G70430 | Ste-20 related kinase SPAK                                                             | 12       | 9   | 19  | 16  | 31            | 39   | 8    | 13   | 4.1E-05    | 9.8E-05 | 3.1E-03 | + |
| III | AT2G31450 | putative endonuclease                                                                  | 53       | 53  | 57  | 55  | 67            | 68   | 56   | 50   | 3.8E-05    | 9.3E-05 | 4.2E-03 | + |
| III | AT4G10710 | putative transcriptional regulator                                                     | 180      | 198 | 200 | 206 | 271           | 252  | 196  | 177  | 6.7E-05    | 1.4E-04 | 5.4E-03 | + |
| III | AT2G20080 | unknown protein                                                                        | 27       | 25  | 32  | 26  | 42            | 47   | 21   | 25   | 1.1E-04    | 2.0E-04 | 6.7E-03 | + |
| III | AT3G02130 | putative protein kinase                                                                | 92       | 87  | 86  | 91  | 104           | 108  | 84   | 83   | 3.9E-05    | 9.5E-05 | 7.7E-03 | + |
| III | AT1G12260 | unknown protein similar to NAM like protein                                            | 25       | 22  | 30  | 26  | 52            | 37   | 19   | 14   | 8.7E-04    | 9.8E-04 | 1.5E-02 | + |
| III | AT3G54320 | aintegumenta-like protein ovule development protein<br>aintegumenta                    | 19       | 13  | 29  | 14  | 38            | 37   | 11   | 5    | 1.3E-03    | 1.3E-03 | 1.6E-02 | + |
| III | AT2G29390 | putative C-4 sterol methyl oxidase                                                     | 259      | 260 | 259 | 267 | 312           | 299  | 241  | 268  | 7.4E-04    | 8.6E-04 | 2.3E-02 | + |
| III | AT2G27600 | putative ATPase skd1 family                                                            | 668      | 662 | 658 | 698 | 729           | 729  | 671  | 645  | 1.9E-03    | 1.7E-03 | 2.5E-02 | + |
| III | AT3G07330 | unknown protein similar to putative glucosyltransferase                                | 130      | 138 | 131 | 135 | 155           | 146  | 128  | 122  | 7.9E-04    | 9.1E-04 | 2.5E-02 | + |
| III | AT4G31150 | putative protein                                                                       | 66       | 56  | 60  | 74  | 82            | 84   | 44   | 58   | 3.4E-03    | 2.8E-03 | 2.6E-02 | + |

|     |           |                                                                                 | Darkness |      |      |      | Continuous FR |      |      |      | Statistics |         |         |   |
|-----|-----------|---------------------------------------------------------------------------------|----------|------|------|------|---------------|------|------|------|------------|---------|---------|---|
| III | AT2G22630 | putative MADS-box protein AGL17                                                 | 8        | 14   | 14   | 16   | 24            | 20   | 12   | 7    | 5.1E-03    | 3.8E-03 | 2.8E-02 | + |
| III | AT5G65780 | branched-chain amino acid aminotransferase                                      | 229      | 245  | 245  | 244  | 285           | 284  | 237  | 194  | 3.0E-03    | 2.5E-03 | 2.9E-02 | + |
| III | AT5G03550 | putative protein                                                                | 6        | 13   | 10   | 11   | 26            | 20   | 8    | 8    | 1.1E-03    | 1.1E-03 | 3.0E-02 | + |
| III | AT4G17120 | hypothetical protein                                                            | 87       | 75   | 90   | 77   | 102           | 113  | 77   | 64   | 2.2E-03    | 2.0E-03 | 3.0E-02 | + |
| III | AT5G10950 | putative protein cylicin II                                                     | 33       | 27   | 33   | 44   | 57            | 47   | 35   | 23   | 7.9E-03    | 5.3E-03 | 3.5E-02 | + |
| III | AT3G61960 | serine/threonine-protein kinase-like protein                                    | 201      | 230  | 221  | 232  | 253           | 292  | 210  | 183  | 5.2E-03    | 3.8E-03 | 3.7E-02 | + |
| III | AT2G36790 | putative glucosyl transferase                                                   | 18       | 29   | 29   | 22   | 41            | 35   | 18   | 19   | 4.6E-03    | 3.5E-03 | 3.7E-02 | + |
| III | AT5G61830 | carbonyl reductase - like protein                                               | 72       | 70   | 73   | 68   | 92            | 81   | 63   | 67   | 1.9E-03    | 1.8E-03 | 3.7E-02 | + |
| III | AT5G45900 | ubiquitin activating enzyme E1-like protein                                     | 93       | 99   | 89   | 116  | 131           | 116  | 84   | 82   | 7.0E-03    | 4.8E-03 | 3.9E-02 | + |
| III | AT2G45680 | putative PCF2-like DNA binding protein                                          | 43       | 50   | 44   | 51   | 55            | 61   | 38   | 44   | 5.5E-03    | 4.0E-03 | 4.8E-02 | + |
| IV  | AT2G33730 | putative U5 small nuclear ribonucleoprotein                                     | 283      | 292  | 266  | 263  | 215           | 212  | 235  | 229  | 2.9E-08    | 6.7E-07 | 1.8E-03 | + |
| IV  | AT5G59880 | actin depolymerizing factor 3 - like protein                                    | 2156     | 2092 | 2055 | 2080 | 1499          | 1494 | 1680 | 1663 | 1.4E-09    | 1.1E-07 | 2.8E-03 | + |
| IV  | AT2G28120 | nodulin-like protein                                                            | 108      | 110  | 84   | 96   | 67            | 68   | 84   | 85   | 6.4E-06    | 2.6E-05 | 3.4E-03 | + |
| IV  | AT3G43300 | guanine nucleotide-exchange - like protein                                      | 229      | 220  | 188  | 187  | 167           | 169  | 169  | 181  | 3.0E-06    | 1.5E-05 | 4.7E-03 | + |
| IV  | AT2G04305 | hypothetical protein                                                            | 123      | 119  | 101  | 102  | 61            | 61   | 65   | 75   | 5.6E-08    | 1.1E-06 | 5.2E-03 | + |
| IV  | AT3G20130 | cytochrome P450                                                                 | 148      | 139  | 109  | 98   | 74            | 67   | 76   | 73   | 4.7E-07    | 4.2E-06 | 5.6E-03 | + |
| IV  | AT5G59530 | 1-aminocyclopropane-1-carboxylate oxidase - like protein                        | 60       | 56   | 38   | 28   | 6             | 10   | 14   | 10   | 5.6E-07    | 4.6E-06 | 6.6E-03 | + |
| IV  | AT4G21610 | Lsd1 like protein zinc-finger protein                                           | 132      | 130  | 118  | 122  | 59            | 64   | 72   | 80   | 1.0E-08    | 3.5E-07 | 6.8E-03 | + |
| IV  | AT2G25560 | putative DnaJ protein                                                           | 129      | 130  | 111  | 104  | 94            | 88   | 94   | 101  | 6.7E-06    | 2.7E-05 | 7.3E-03 | + |
| IV  | AT5G18690 | proline-rich protein                                                            | 246      | 221  | 192  | 182  | 133           | 117  | 158  | 158  | 7.0E-06    | 2.8E-05 | 7.4E-03 | + |
| IV  | AT1G34190 | NAM(no apical meristem) protein                                                 | 495      | 484  | 450  | 439  | 312           | 335  | 347  | 346  | 3.3E-08    | 7.3E-07 | 7.5E-03 | + |
| IV  | AT4G36480 | serine C-palmitoyltransferase like protein                                      | 215      | 213  | 207  | 202  | 118           | 122  | 178  | 156  | 9.2E-07    | 6.5E-06 | 7.7E-03 | + |
| IV  | AT1G76090 | S-adenosyl-methionine-sterol-C-methyltransferase                                | 831      | 810  | 690  | 732  | 426           | 388  | 443  | 464  | 1.8E-08    | 4.9E-07 | 8.1E-03 | + |
| IV  | AT5G43040 | CHP-rich zinc finger protein-like                                               | 57       | 64   | 36   | 45   | 15            | 23   | 32   | 37   | 4.2E-05    | 1.0E-04 | 9.0E-03 | + |
| IV  | AT5G43190 | F-box protein family, AtFBX6 contains similarity to unusual floral organs (UFO) | 228      | 241  | 193  | 192  | 115           | 128  | 124  | 118  | 2.4E-08    | 5.8E-07 | 1.1E-02 | + |
| IV  | AT3G44400 | disease resistance - like protein RPP1                                          | 21       | 23   | 13   | 17   | 2             | 7    | 13   | 13   | 1.2E-04    | 2.2E-04 | 1.3E-02 | + |
| IV  | AT4G08980 | F-box protein family                                                            | 440      | 436  | 427  | 428  | 286           | 305  | 333  | 353  | 1.1E-07    | 1.7E-06 | 1.4E-02 | + |
| IV  | AT4G32600 | putative protein ring finger protein                                            | 203      | 206  | 183  | 181  | 152           | 167  | 166  | 170  | 2.3E-05    | 6.4E-05 | 1.7E-02 | + |
| IV  | AT2G20560 | putative heat shock protein                                                     | 141      | 136  | 99   | 122  | 58            | 73   | 93   | 90   | 5.8E-05    | 1.3E-04 | 1.8E-02 | + |
| IV  | AT5G09920 | 15.9 kDa subunit of RNA polymerase II                                           | 395      | 396  | 377  | 370  | 265           | 257  | 271  | 290  | 2.0E-08    | 5.3E-07 | 1.8E-02 | + |
| IV  | AT3G08890 | unknown protein                                                                 | 160      | 149  | 145  | 138  | 98            | 113  | 131  | 128  | 8.2E-05    | 1.7E-04 | 2.1E-02 | + |
| IV  | AT3G01260 | putative aldose 1-epimerase                                                     | 291      | 308  | 197  | 227  | 133           | 137  | 110  | 121  | 2.3E-07    | 2.6E-06 | 2.1E-02 | + |
| IV  | AT1G15170 | hypothetical protein                                                            | 108      | 103  | 97   | 104  | 55            | 49   | 66   | 71   | 2.5E-07    | 2.8E-06 | 2.1E-02 | + |
| IV  | AT3G13320 | low affinity calcium antiporter CAX2                                            | 208      | 213  | 189  | 174  | 154           | 163  | 177  | 164  | 1.2E-04    | 2.1E-04 | 2.1E-02 | + |
| IV  | AT5G13890 | putative protein                                                                | 196      | 209  | 185  | 194  | 132           | 126  | 146  | 147  | 4.9E-07    | 4.3E-06 | 2.1E-02 | + |
| IV  | AT2G19800 | unknown protein                                                                 | 39       | 44   | 34   | 37   | 26            | 29   | 34   | 33   | 3.8E-04    | 5.2E-04 | 2.2E-02 | + |
| IV  | AT5G04410 | putative protein NAC2                                                           | 506      | 512  | 486  | 477  | 386           | 383  | 385  | 402  | 1.9E-08    | 5.1E-07 | 2.2E-02 | + |
| IV  | AT5G41320 | unknown protein                                                                 | 29       | 26   | 20   | 13   | 5             | 5    | 7    | 10   | 2.4E-05    | 6.7E-05 | 2.3E-02 | + |
| IV  | AT3G03860 | unknown protein                                                                 | 419      | 444  | 336  | 340  | 226           | 284  | 350  | 289  | 4.7E-04    | 6.1E-04 | 2.3E-02 | + |
| IV  | AT4G11260 | putative protein phosphatase like protein                                       | 705      | 607  | 488  | 519  | 348           | 360  | 402  | 380  | 1.9E-05    | 5.8E-05 | 2.4E-02 | + |
| IV  | AT1G22300 | 14-3-3 protein GF14epsilon (grf10)                                              | 3318     | 3260 | 2980 | 2900 | 2189          | 2066 | 2139 | 2349 | 3.8E-07    | 3.6E-06 | 2.4E-02 | + |
| IV  | AT5G59680 | serine/threonine-specific protein kinase                                        | 51       | 56   | 40   | 31   | 25            | 25   | 24   | 30   | 3.9E-05    | 9.5E-05 | 2.4E-02 | + |
| IV  | AT5G64190 | putative protein                                                                | 28       | 27   | 16   | 19   | 3             | 4    | 11   | 4    | 1.2E-05    | 4.0E-05 | 2.5E-02 | + |
| IV  | AT1G70330 | unknown protein                                                                 | 1168     | 1134 | 1023 | 1128 | 723           | 750  | 858  | 862  | 2.3E-06    | 1.2E-05 | 2.5E-02 | + |
| IV  | AT3G12760 | unknown protein                                                                 | 1007     | 949  | 938  | 943  | 650           | 661  | 725  | 770  | 4.6E-07    | 4.1E-06 | 2.5E-02 | + |
| IV  | AT2G42570 | unknown protein                                                                 | 432      | 421  | 408  | 405  | 179           | 175  | 191  | 214  | 4.1E-10    | 5.6E-08 | 2.6E-02 | + |
| IV  | AT3G51330 | putative protein                                                                | 243      | 230  | 173  | 193  | 123           | 125  | 110  | 117  | 1.9E-07    | 2.3E-06 | 2.6E-02 | + |
| IV  | AT1G76920 | F-box protein family                                                            | 536      | 490  | 486  | 470  | 318           | 290  | 370  | 362  | 2.1E-06    | 1.2E-05 | 2.7E-02 | + |
| IV  | AT1G17230 | putative leucine-rich receptor protein kinase                                   | 72       | 76   | 65   | 62   | 34            | 39   | 43   | 38   | 4.1E-07    | 3.8E-06 | 2.8E-02 | + |
| IV  | AT5G39190 | germin-like protein (GLP2a) copy2                                               | 34       | 36   | 35   | 33   | 11            | 11   | 16   | 16   | 5.7E-09    | 2.6E-07 | 2.9E-02 | + |
| IV  | AT3G51895 | sulfate transporter ATST1                                                       | 155      | 157  | 117  | 132  | 59            | 48   | 51   | 61   | 1.3E-07    | 1.8E-06 | 3.1E-02 | + |
| IV  | AT2G41960 | unknown protein                                                                 | 196      | 189  | 181  | 180  | 154           | 161  | 163  | 162  | 3.6E-06    | 1.7E-05 | 3.2E-02 | + |
| IV  | AT5G60660 | mipC protein - like (aquaporin) mipC protein                                    | 3001     | 2738 | 2480 | 2498 | 549           | 589  | 650  | 599  | 1.0E-09    | 9.4E-08 | 3.2E-02 | + |
| IV  | AT3G04080 | apyrase (Atapy1)                                                                | 149      | 158  | 120  | 138  | 116           | 107  | 126  | 120  | 5.9E-04    | 7.3E-04 | 3.3E-02 | + |
| IV  | AT5G45070 | putative protein contains similarity to disease resistance protein              | 109      | 125  | 78   | 103  | 18            | 42   | 66   | 62   | 1.5E-04    | 2.5E-04 | 3.4E-02 | + |
| IV  | AT1G54115 | unknown protein                                                                 | 342      | 324  | 289  | 303  | 243           | 235  | 237  | 247  | 1.3E-06    | 8.4E-06 | 3.4E-02 | + |
| IV  | AT4G27040 | SNF8 like protein                                                               | 338      | 368  | 306  | 291  | 211           | 208  | 217  | 205  | 6.8E-07    | 5.3E-06 | 3.5E-02 | + |
| IV  | AT2G04500 | unknown protein                                                                 | 32       | 40   | 24   | 24   | 13            | 19   | 18   | 22   | 5.2E-04    | 6.6E-04 | 3.5E-02 | + |
| IV  | AT5G44340 | tubulin beta-4 chain                                                            | 3036     | 3008 | 2884 | 2896 | 2234          | 2089 | 2268 | 2400 | 4.0E-07    | 3.7E-06 | 3.7E-02 | + |
| IV  | AT5G40370 | glutaredoxin -like protein                                                      | 1284     | 1209 | 1138 | 1125 | 835           | 860  | 888  | 1000 | 1.6E-05    | 5.1E-05 | 3.8E-02 | + |
| IV  | AT4G14160 | transport protein                                                               | 519      | 507  | 464  | 504  | 346           | 380  | 428  | 410  | 3.1E-05    | 8.0E-05 | 3.9E-02 | + |
| IV  | AT1G64040 | phosphoprotein phosphatase 1 i                                                  | 680      | 726  | 695  | 707  | 446           | 463  | 532  | 524  | 1.1E-07    | 1.7E-06 | 3.9E-02 | + |

|    |           |                                                                                      | Darkness |      |      |      | Continuous FR |      |      |      | Statistics |         |         |   |
|----|-----------|--------------------------------------------------------------------------------------|----------|------|------|------|---------------|------|------|------|------------|---------|---------|---|
| IV | AT3G02240 | unknown protein                                                                      | 70       | 57   | 38   | 34   | 5             | 24   | 35   | 21   | 8.1E-04    | 9.3E-04 | 3.9E-02 | + |
| IV | AT2G43940 | unknown protein                                                                      | 198      | 187  | 153  | 148  | 135           | 100  | 127  | 144  | 6.2E-04    | 7.6E-04 | 4.0E-02 | + |
| IV | AT5G63600 | 1-aminocyclopropane-1-carboxylic acid oxidase-like protein                           | 1873     | 1797 | 1467 | 1342 | 884           | 1064 | 890  | 883  | 9.7E-07    | 6.7E-06 | 4.2E-02 | + |
| IV | AT1G01230 | hypothetical protein                                                                 | 485      | 484  | 457  | 456  | 299           | 286  | 302  | 286  | 4.2E-10    | 5.6E-08 | 4.2E-02 | + |
| IV | AT3G51550 | receptor-protein kinase-like protein                                                 | 859      | 894  | 834  | 836  | 655           | 635  | 794  | 704  | 9.1E-05    | 1.8E-04 | 4.2E-02 | + |
| IV | AT1G18460 | unknown protein                                                                      | 267      | 238  | 211  | 224  | 185           | 167  | 192  | 203  | 4.0E-04    | 5.4E-04 | 4.3E-02 | + |
| IV | AT3G21700 | putative GTP1 monomeric G-protein                                                    | 66       | 74   | 62   | 67   | 35            | 31   | 52   | 42   | 2.2E-05    | 6.3E-05 | 4.4E-02 | + |
| IV | AT1G66200 | glutamine synthetase                                                                 | 3111     | 2603 | 2178 | 2174 | 1250          | 1328 | 1316 | 1410 | 8.4E-06    | 3.2E-05 | 4.4E-02 | + |
| IV | AT4G23030 | putative protein                                                                     | 117      | 132  | 111  | 91   | 44            | 49   | 59   | 59   | 7.5E-06    | 2.9E-05 | 4.5E-02 | + |
| IV | AT2G25940 | putative vacuolar processing enzyme                                                  | 44       | 45   | 43   | 34   | 24            | 27   | 33   | 36   | 7.8E-04    | 9.0E-04 | 4.5E-02 | + |
| IV | AT3G59990 | putative protein ETHIONINE AMINOPEPTIDASE 2 (EC 3.4.11.18)                           | 477      | 484  | 455  | 473  | 415           | 391  | 441  | 428  | 9.5E-05    | 1.8E-04 | 4.5E-02 | + |
| IV | AT5G15830 | bZIP DNA-binding protein-like                                                        | 221      | 198  | 168  | 165  | 104           | 133  | 127  | 134  | 7.8E-05    | 1.6E-04 | 4.6E-02 | + |
| IV | AT1G62880 | unknown protein                                                                      | 102      | 101  | 95   | 85   | 43            | 55   | 70   | 59   | 2.5E-05    | 6.9E-05 | 4.7E-02 | + |
| IV | AT2G21410 | putative vacuolar proton-ATPase subunit                                              | 413      | 433  | 356  | 378  | 307           | 316  | 311  | 297  | 3.1E-06    | 1.5E-05 | 4.7E-02 | + |
| IV | AT2G29700 | unknown protein                                                                      | 926      | 850  | 767  | 818  | 626           | 619  | 704  | 652  | 5.1E-05    | 1.1E-04 | 4.7E-02 | + |
| IV | AT2G40530 | hypothetical protein                                                                 | 38       | 34   | 33   | 27   | 10            | 17   | 21   | 23   | 2.0E-04    | 3.3E-04 | 4.9E-02 | + |
| V  | AT1G53380 | unknown protein                                                                      | 119      | 118  | 112  | 107  | 95            | 99   | 112  | 110  | 1.2E-05    | 4.0E-05 | 2.1E-03 | + |
| V  | AT4G30580 | putative protein 2-acylglycerophosphoethanolamine acyltransferase                    | 332      | 334  | 309  | 314  | 301           | 285  | 320  | 315  | 1.2E-04    | 2.2E-04 | 5.3E-03 | + |
| V  | AT1G28200 | FH protein interacting protein FIP1 identical to FH protein interacting protein FIP1 | 434      | 443  | 404  | 433  | 325           | 350  | 408  | 412  | 5.5E-05    | 1.2E-04 | 9.7E-03 | + |
| V  | AT5G10780 | putative protein HSPC184                                                             | 682      | 724  | 668  | 666  | 624           | 621  | 689  | 665  | 1.5E-03    | 1.5E-03 | 2.0E-02 | + |
| V  | AT2G26830 | putative choline kinase                                                              | 181      | 189  | 165  | 178  | 150           | 153  | 176  | 168  | 8.9E-04    | 9.9E-04 | 2.1E-02 | + |
| V  | AT3G04120 | glyceraldehyde-3-phosphate dehydrogenase C subunit (GapC)                            | 4519     | 4499 | 4197 | 4449 | 3674          | 3930 | 4270 | 4516 | 1.2E-03    | 1.3E-03 | 2.4E-02 | + |
| V  | AT3G14100 | oligouridylylate binding protein                                                     | 1207     | 1113 | 1031 | 1090 | 760           | 904  | 1043 | 1042 | 8.5E-04    | 9.6E-04 | 2.7E-02 | + |
| V  | AT1G16280 | putative ATP-dependent RNA helicase                                                  | 94       | 102  | 96   | 89   | 68            | 66   | 96   | 83   | 4.9E-04    | 6.3E-04 | 3.0E-02 | + |
| V  | AT1G67570 | hypothetical protein                                                                 | 70       | 72   | 68   | 55   | 48            | 55   | 67   | 65   | 5.9E-03    | 4.2E-03 | 3.2E-02 | + |
| V  | AT2G01070 | unknown protein                                                                      | 122      | 143  | 113  | 124  | 82            | 90   | 111  | 127  | 1.9E-03    | 1.8E-03 | 3.3E-02 | + |
| V  | AT3G57880 | anthranilate phosphoribosyltransferase-like protein                                  | 225      | 225  | 175  | 217  | 163           | 152  | 195  | 197  | 2.3E-03    | 2.1E-03 | 3.4E-02 | + |
| V  | AT4G34460 | GTP binding protein beta subunit                                                     | 344      | 323  | 309  | 307  | 233           | 275  | 300  | 301  | 1.2E-03    | 1.3E-03 | 3.6E-02 | + |
| V  | AT2G36330 | hypothetical protein                                                                 | 102      | 98   | 85   | 93   | 59            | 75   | 83   | 88   | 1.2E-03    | 1.3E-03 | 3.7E-02 | + |
| V  | AT3G25545 | Expressed protein                                                                    | 111      | 125  | 118  | 106  | 84            | 84   | 117  | 106  | 1.5E-03    | 1.5E-03 | 3.8E-02 | + |
| V  | AT3G19760 | RNA helicase                                                                         | 1010     | 998  | 1000 | 929  | 921           | 876  | 988  | 986  | 6.7E-03    | 4.7E-03 | 3.9E-02 | + |
| V  | AT4G26720 | phosphoprotein phosphatase (PPX-1)                                                   | 223      | 192  | 190  | 189  | 113           | 149  | 179  | 205  | 3.1E-03    | 2.6E-03 | 4.4E-02 | + |
| V  | AT2G17820 | putative histidine kinase                                                            | 118      | 129  | 114  | 104  | 97            | 91   | 120  | 104  | 6.5E-03    | 4.6E-03 | 4.4E-02 | + |
| V  | AT5G16760 | Inositol 1,3,4-Trisphosphate 5/6 kinase                                              | 410      | 454  | 396  | 423  | 342           | 333  | 417  | 386  | 1.8E-03    | 1.7E-03 | 4.5E-02 | + |
| V  | AT4G27250 | putative protein dihydrokaempferol 4-reductase                                       | 23       | 24   | 18   | 21   | 8             | 12   | 15   | 21   | 1.7E-03    | 1.6E-03 | 4.6E-02 | + |
| V  | AT5G50375 | Expressed protein                                                                    | 310      | 310  | 253  | 317  | 188           | 209  | 269  | 322  | 4.4E-03    | 3.4E-03 | 4.6E-02 | + |
| V  | AT3G15120 | chaperone-like ATPase                                                                | 160      | 193  | 153  | 148  | 122           | 123  | 142  | 158  | 4.7E-03    | 3.6E-03 | 4.6E-02 | + |

Clusters I, II and III include genes with expression promoted by continuous FR (less promoted in *blh1-1*) and clusters IV and V include genes with expression reduced by continuous FR (less reduced in *blh1-1*). Biological replicates, P and q values for treatments and P values for interaction are shown for each gene. The presence of the TGGG sequence in the promoter is also indicated but not all these genes are predicted to be direct targets of BLH1. The closest homologues of the tobacco *Lhcb1\*2* gene used in this paper are *AtLhcb1\*1* (At1 g29920) and *AtLhcb1\*2* (At1 g29910). At1 g29920 is not present in the ATH1 microarray. At1 g29910 is present but it showed no significantly reduced response to continuous FR, very likely because a single pulse of light is enough to induce an extreme promotion of the expression of these genes 6 h later (Anderson, S.L., Somers, D.E., Millar, A.J., Hanson, K., Chory, J., Kay, S.A. 1997. Attenuation of phytochrome A and B signaling pathways by the Arabidopsis circadian clock. *Plant Cell* 9: 1727–1743) leaving little room for a HIR. In agreement with the latter interpretation, reduced promotion of the *AtLhcb1\*1* (At1 g29920) and *AtLhcb1\*2* (At1 g29910) genes is observed in seedlings exposed to 24 h FR and analysed by real time PCR (see main text).
